# Supplementary material for: TLR4-Mediated Recognition of Mouse Polyomavirus Promotes Cancer-Associated Fibroblast-Like Phenotype and Cell Invasiveness
Source: MDPI journal article supplement (doi:10.3390/cancers13092076), 2021-04-25
Supplement: s1 [file s1]

Figure S1

Un-cropped images for Figure 3c

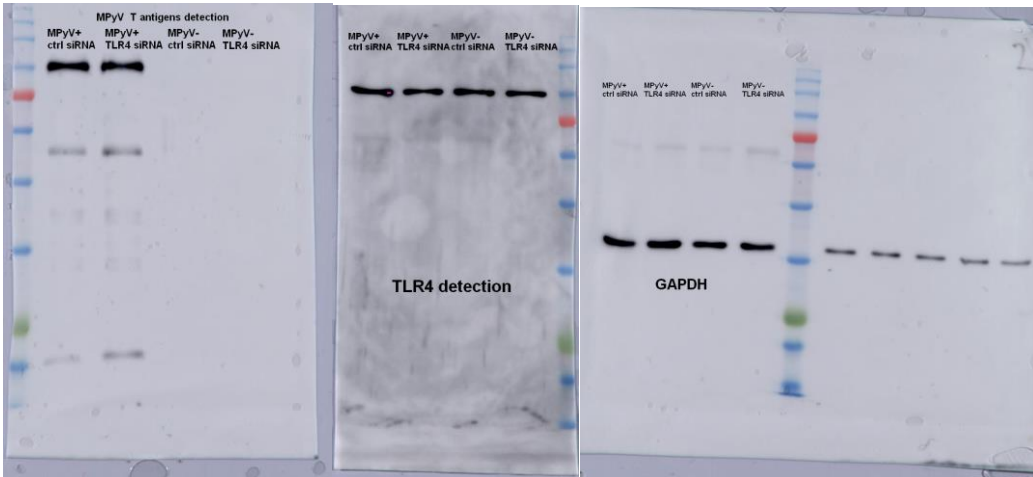

Un-cropped images for Figure 4b

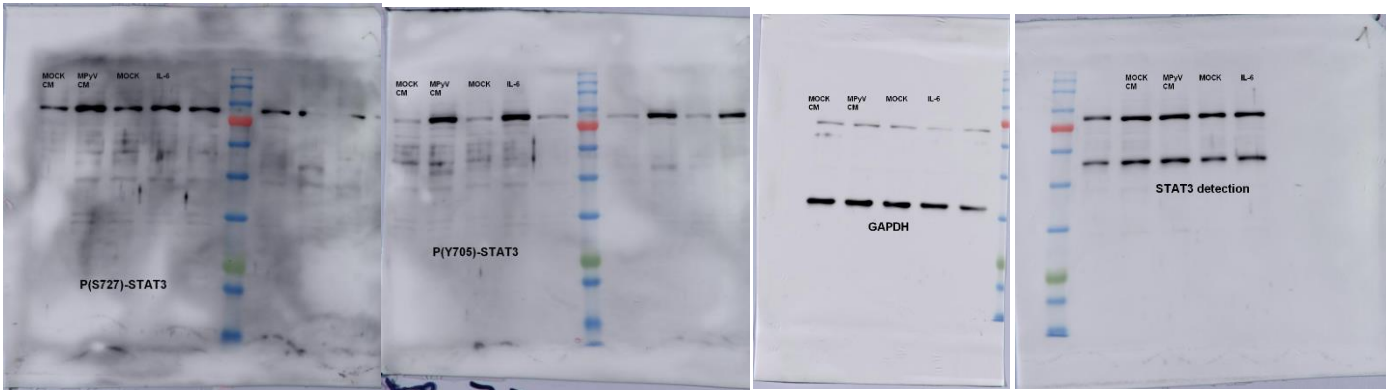

Un-cropped images for Figure 4c

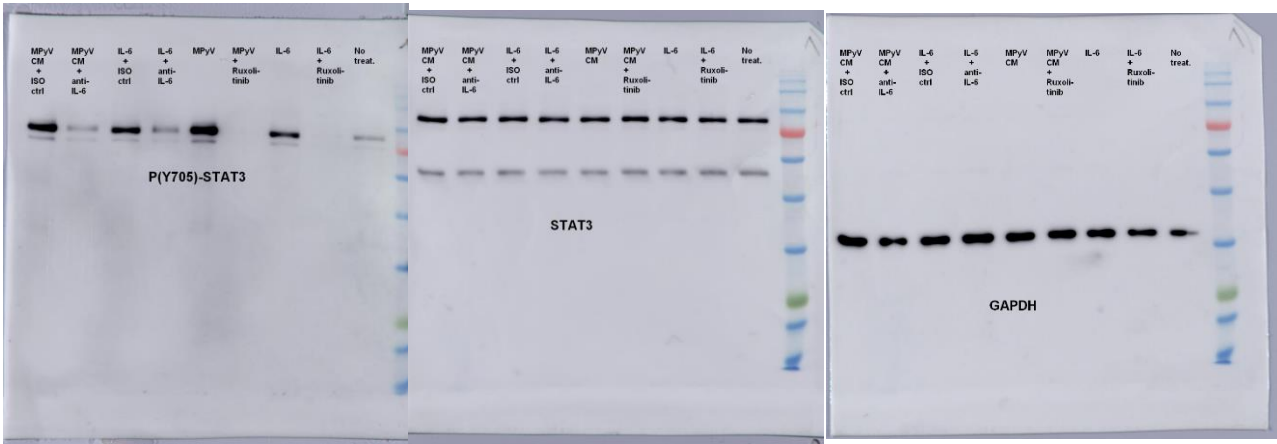

Un-cropped images for Figure 5a

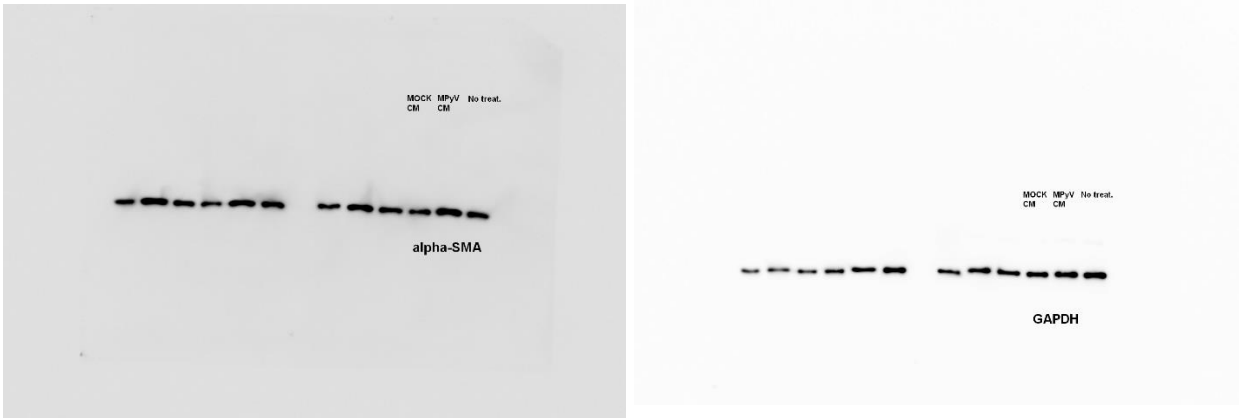

Un-cropped image for Figure S3a

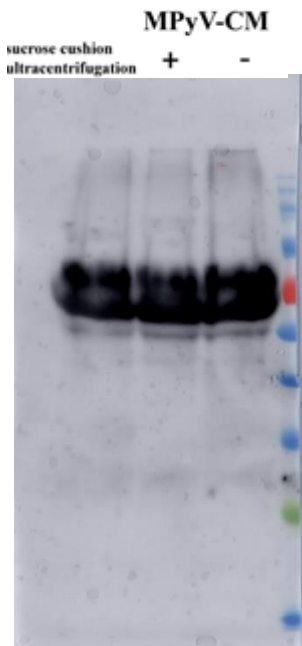

**Figure S2**

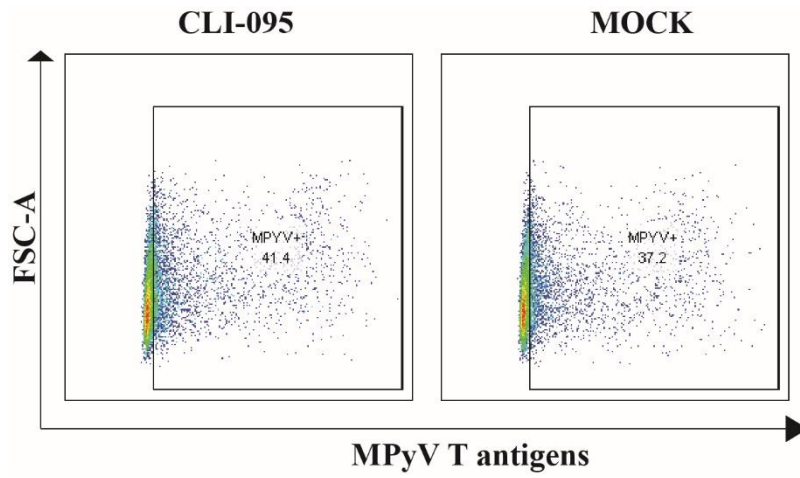

**Figure S2.** Effect of TLR4 signaling on MPyV lifecycle in 3T6 cells. Flow cytometry analysis of the percentage of MPyV positive MEFs determined by expression of T antigens in the presence or absence (MOCK) of TLR4 inhibitor CLI-095 (10  $\mu$ M).

**Figure S3**

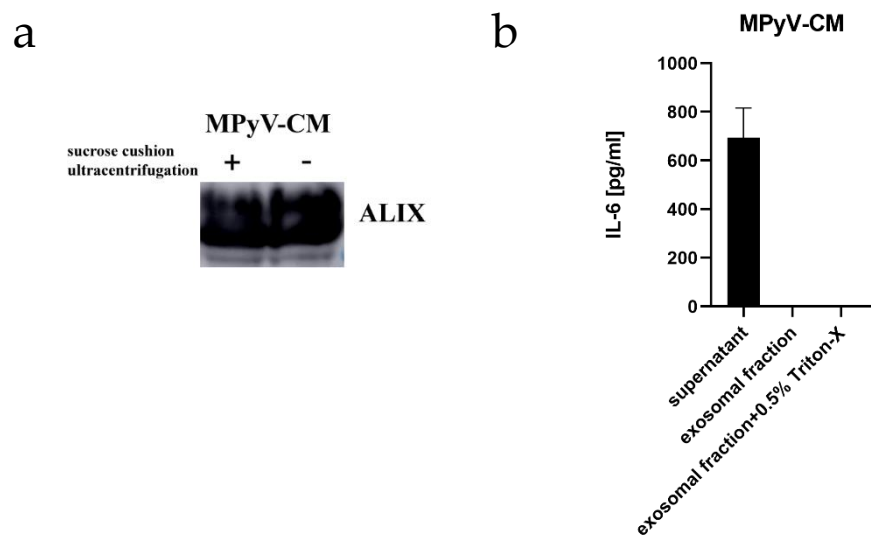

**Figure S3.** Analysis of MPyV-CM. (a) The detection of exosomal marker ALIX in exosomal fraction from MPyV-CM. (b) The presence of soluble IL-6 and exosomal IL-6 determined by ELISA.
